# Supplementary material
Source: MDPI journal article supplement (https://www.mdpi.com/2073-4344/8/1/9)
Supplement: s1 [file s1]

# Supplementary Materials: One-Pot Multi-Enzymatic Production of Purine Derivatives with Application in Pharmaceutical and Food Industry

**Table S1.** Effect of molar ratio in the production of purine NAs catalyzed by *Ld*NDT or *Ld*NDT/*Tt*HGXPRT.

| Catalyst                                     | Donor<br>(mM) | Acceptor<br>(mM) | Product | Conversion<br>(%) |
|----------------------------------------------|---------------|------------------|---------|-------------------|
| <i>Ld</i> NDT <sup>a</sup>                   | dIno (1)      | Cyt (1)          | dCyd    | 19±3              |
|                                              | dIno (3)      | Cyt (1)          | dCyd    | 30±1              |
| <i>Ld</i> NDT/ <i>Tt</i> HGXPRT <sup>b</sup> | dIno (1)      | Cyt (1)          | dCyd    | 26±0              |
|                                              | dIno (3)      | Cyt (1)          | dCyd    | 39±3              |

<sup>a</sup> Reaction conditions: 0.3 µg of enzyme in 40 µL at 50 °C, 5 min and 300 rpm [dIno] = 3 mM or 1 mM; [base] = 1 mM, in 50 mM sodium phosphate buffer, pH 6.0.

<sup>b</sup> Reaction conditions: 0.3 µg of *Ld*NDT, 1 µg of *Tt*HGXPRT in 40 µL at 50 °C and 300 rpm, 20-60 min. [dIno] = 1 mM or 3 mM; [base] = 1 mM, [PRPP] = 1 mM, [MgCl<sub>2</sub>] = 1.2 mM, in 50 mM sodium phosphate buffer, pH 6.0.
